# Supplementary material for: Swellable functional hypercrosslinked polymer networks for the uptake of chemical warfare agents
Source: Royal Society of Chemistry journal article supplement (doi:10.1039/c7py00040e), 2017-01-01
Supplement: c7py00040e1.pdf [file c7py00040e1.pdf]

**Swellable functional hypercrosslinked polymer networks for the uptake of chemical warfare agents**

Craig Wilson,<sup>a</sup> Marcus J. Main,<sup>c</sup> Nicholas J. Cooper,<sup>c</sup> Michael E. Briggs,<sup>\*a</sup> Andrew I. Cooper<sup>a</sup> and Dave J. Adams<sup>\*ab</sup>

<sup>a</sup> Materials Innovation Factory and Department of Chemistry, University of Liverpool, Crown Street, Liverpool, L69 7ZD, UK.

<sup>b</sup> School of Chemistry, College of Science and Engineering, University of Glasgow, Glasgow, G12 8QQ.  
Email; dave.adams@glasgow.ac.uk

<sup>c</sup> Dstl, Porton Down, Salisbury, SP4 0JQ, Wiltshire, United Kingdom

## **SUPPORTING INFORMATION**

| Monomer       | Equivalent FDA | Yield (%) |
|---------------|----------------|-----------|
| Toluene       | 1.5            | 106       |
| Toluene       | 1.6            | 113       |
| Toluene       | 1.7            | 111       |
| Toluene       | 1.9            | 109       |
| Toluene       | 2              | 114       |
| Toluene       | 2.3            | 108       |
| Toluene       | 2.5            | 107       |
| Toluene       | 2.7            | 109       |
| Toluene       | 3              | 119       |
| Toluene       | 4              | 120       |
| Toluene       | 5              | 116       |
| Chlorobenzene | 2              | 91        |
| Chlorobenzene | 3              | 92        |
| Fluorobenzene | 2              | 102       |
| Fluorobenzene | 3              | 93        |
| Anisole       | 2              | 97        |
| Anisole       | 3              | 98        |
| Phenol        | 2              | 70        |
| Phenol        | 3              | 92        |

**Fig. S1** Percentage yields for HCPs prepared.

| Monomer       | Equivalent FDA | Theoretical C (%) | Actual C (%) | Theoretical H (%) | Actual H (%) |
|---------------|----------------|-------------------|--------------|-------------------|--------------|
| Toluene       | 1.5            | 91.84             | 87.94        | 8.16              | 6.53         |
| Toluene       | 1.6            | 91.76             | 85.84        | 8.24              | 6.47         |
| Toluene       | 1.7            | 91.69             | 86.73        | 8.31              | 6.53         |
| Toluene       | 1.9            | 91.54             | 86.25        | 8.46              | 6.51         |
| Toluene       | 2              | 91.47             | 85.56        | 8.53              | 6.29         |
| Toluene       | 2.3            | 91.27             | 84.43        | 8.73              | 6.33         |
| Toluene       | 2.5            | 91.88             | 84.36        | 8.12              | 6.27         |
| Toluene       | 2.7            | 91.74             | 84.53        | 8.26              | 6.30         |
| Toluene       | 3              | 91.55             | 82.48        | 8.45              | 6.00         |
| Toluene       | 4              | 91.61             | 80.61        | 8.39              | 5.89         |
| Toluene       | 5              | 91.67             | 76.37        | 8.33              | 5.58         |
| Chlorobenzene | 2              | 69.33             | 66.61        | 5.09              | 3.75         |
| Chlorobenzene | 3              | 71.30             | 65.99        | 5.32              | 3.66         |
| Fluorobenzene | 2              | 78.67             | 76.01        | 5.78              | 4.24         |
| Fluorobenzene | 3              | 79.39             | 72.87        | 6.66              | 4.05         |
| Anisole       | 2              | 80.56             | 75.68        | 7.51              | 5.55         |
| Anisole       | 3              | 81.60             | 70.68        | 7.53              | 5.01         |
| Phenol        | 2              | 79.97             | 71.72        | 6.71              | 5.02         |
| Phenol        | 3              | 81.17             | 67.55        | 6.81              | 4.71         |

**Fig. S2** Microanalysis data for HCPs prepared.

| <b>Monomer</b> | <b>Equivalent<br/>FDA</b> | <b>Mass loss<br/>(wt %)</b> |
|----------------|---------------------------|-----------------------------|
| Toluene        | 1.5                       | 0.8                         |
| Toluene        | 1.6                       | 1.0                         |
| Toluene        | 1.7                       | 1.5                         |
| Toluene        | 1.9                       | 0.9                         |
| Toluene        | 2                         | 1.0                         |
| Toluene        | 2.3                       | 1.1                         |
| Toluene        | 2.5                       | 0.9                         |
| Toluene        | 2.7                       | 1.0                         |
| Toluene        | 3                         | 2.7                         |
| Toluene        | 4                         | 2.0                         |
| Toluene        | 5                         | 3.1                         |
| Chlorobenzene  | 2                         | 0.5                         |
| Chlorobenzene  | 3                         | 0.5                         |
| Fluorobenzene  | 2                         | 0.5                         |
| Fluorobenzene  | 3                         | 0.9                         |
| Anisole        | 2                         | 1.3                         |
| Anisole        | 3                         | 3.7                         |
| Phenol         | 2                         | 4.6                         |
| Phenol         | 3                         | 7.5                         |

**Fig. S3** TGA data for HCPs, showing mass loss (wt%) after heating the polymer to 150 °C and holding at 150 °C for 60 minutes.

(a)

| Toluene HCP<br>(2 equivalent FDA) | Atomic<br>% |
|-----------------------------------|-------------|
| Fe                                | 0           |
| O                                 | 7.5         |
| C                                 | 91.9        |
| Cl                                | 0.6         |
| Total                             | 100 %       |

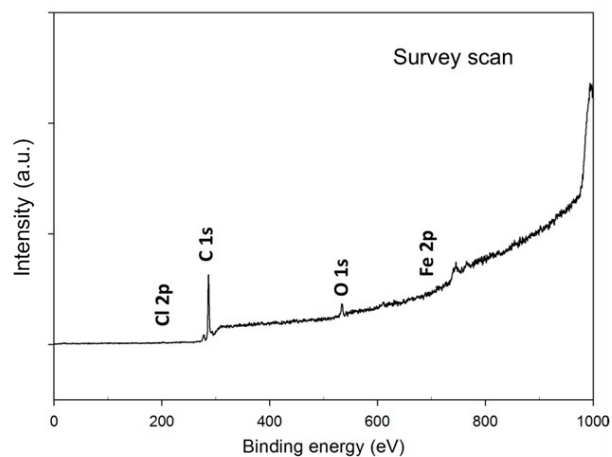

(b)

| Toluene HCP<br>(5 equivalent FDA) | Atomic<br>% |
|-----------------------------------|-------------|
| Fe                                | 0.3         |
| O                                 | 15.2        |
| C                                 | 83.9        |
| Cl                                | 0.6         |
| Total                             | 100 %       |

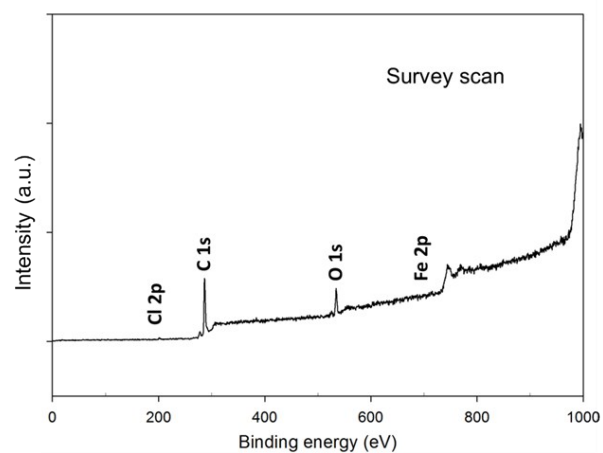

**Fig. S4** Atomic composition (%) from XPS analysis for toluene HCPs prepared using (a) 2 equivalents and (b) 5 equivalents of FDA crosslinker.

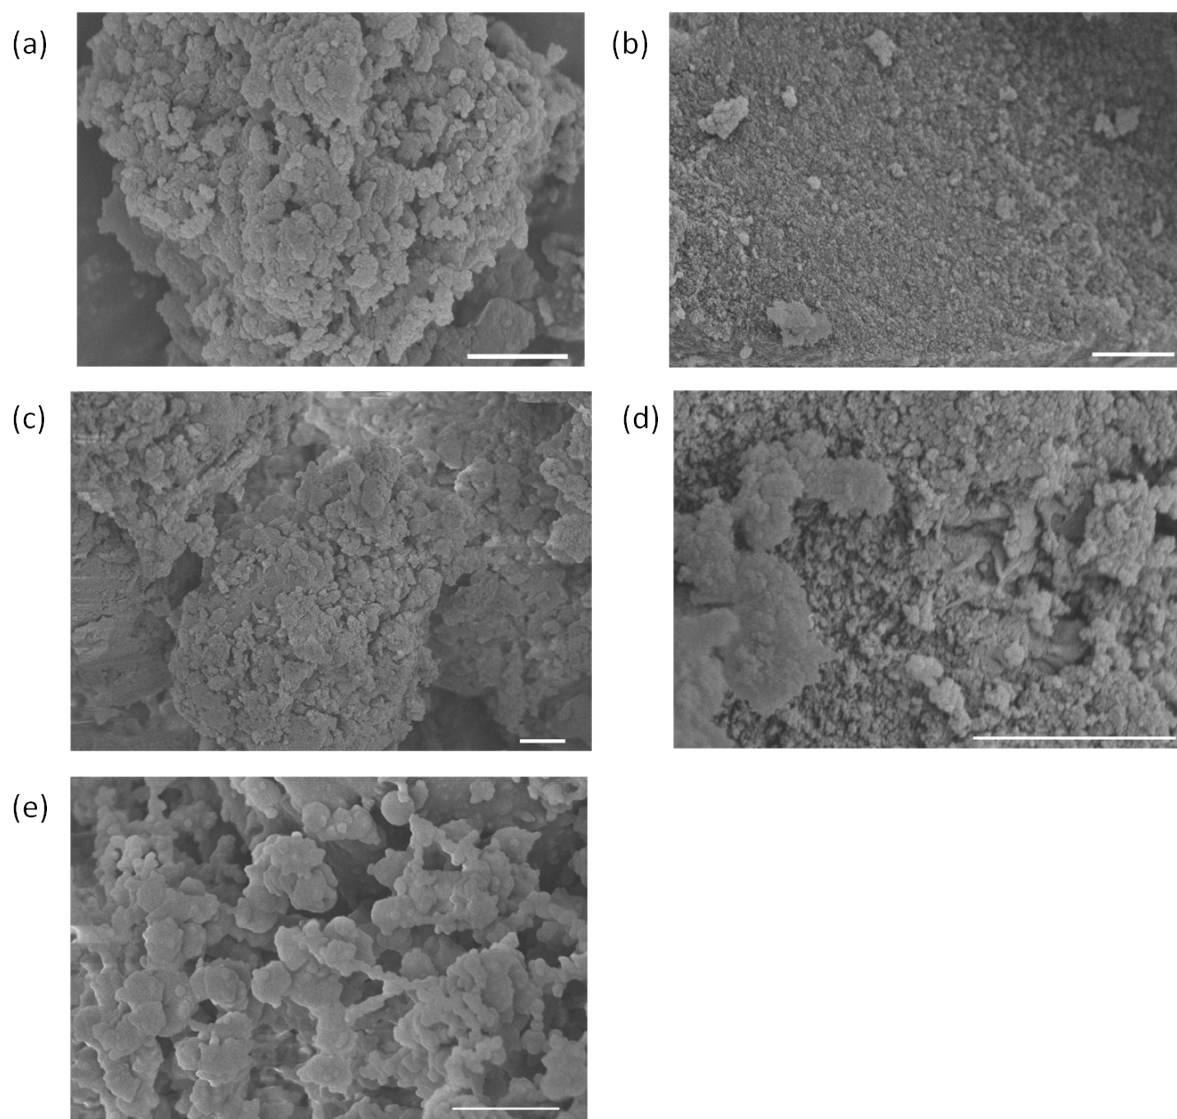

**Fig. S5** SEM micrographs obtained for (a) fluorobenzene, (b) toluene, (c) chlorobenzene, (d) anisole, and (e) phenol based HCPs, all prepared with 2 equivalents of the FDA crosslinker.

(scale bar= 1.00  $\mu\text{m}$ )

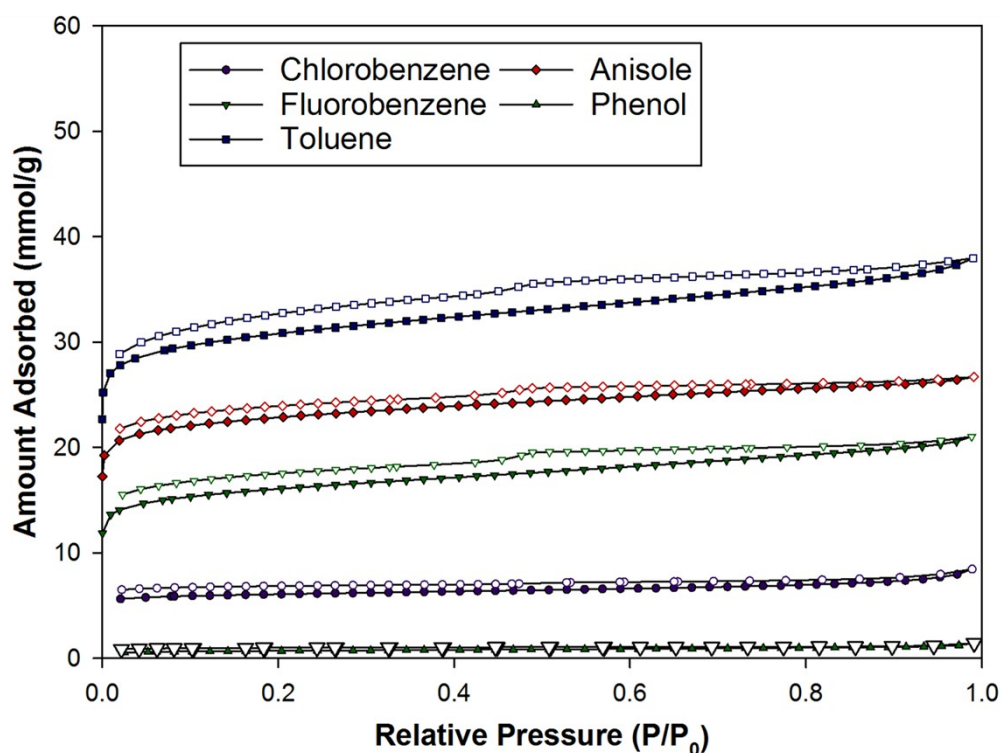

**Fig. S6.1** Nitrogen isotherms for HCPs prepared using 2 equivalents of FDA. Adsorption (filled symbols), desorption (empty symbols). Data offset by 20 mmol/g (using 5 mmol/g increments) for clarity.

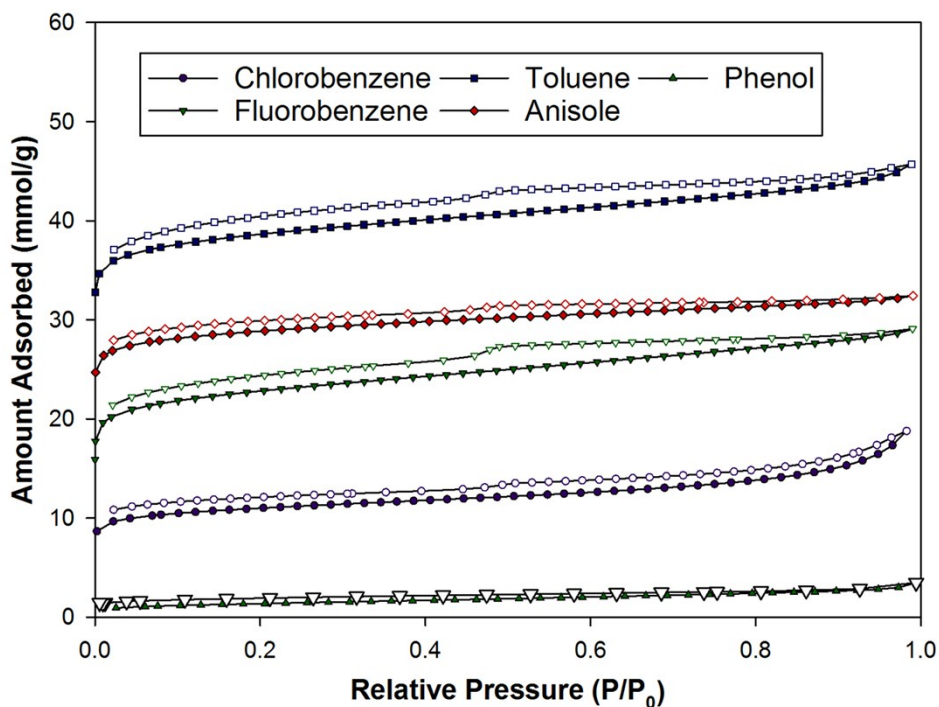

**Fig. S6.2** Nitrogen isotherms for HCPs prepared using 3 equivalents of FDA. Adsorption (filled symbols), desorption (empty symbols). Data offset by 20 mmol/g (using 5 mmol/g increments) for clarity.

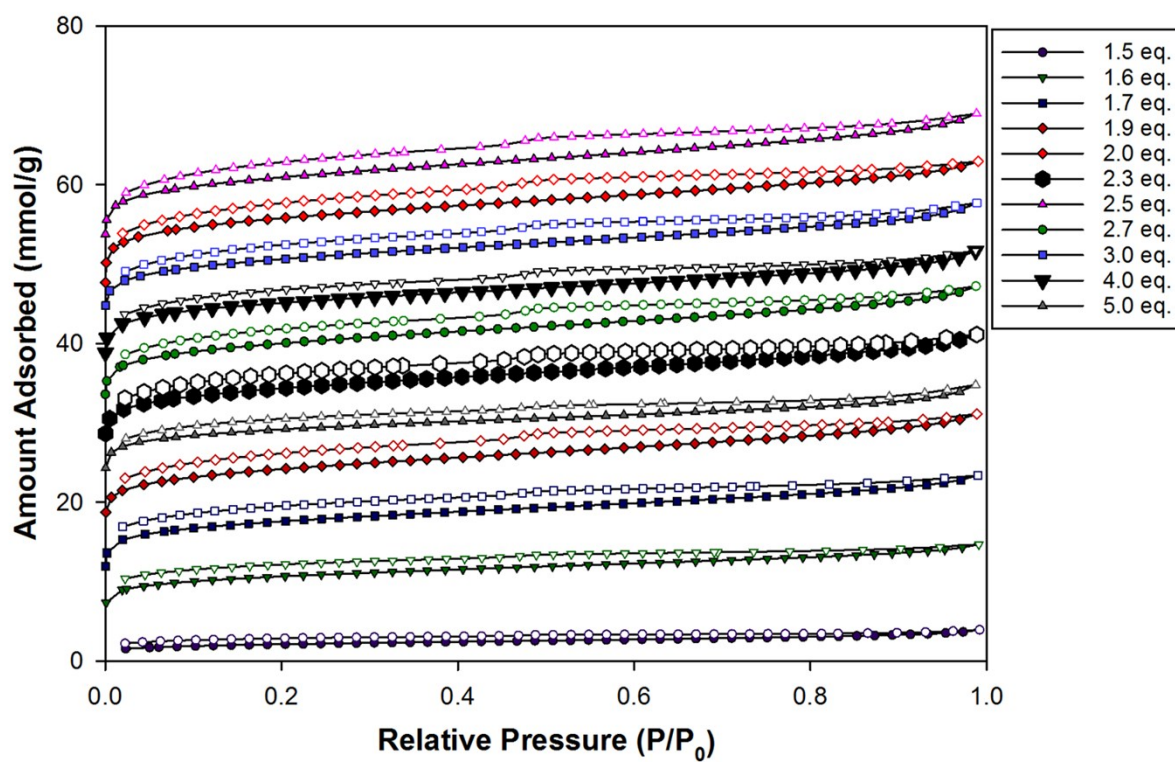

**Fig. S6.3** Nitrogen isotherms for toluene HCPs with varying FDA amounts. Adsorption (filled symbols), desorption (empty symbols). Data offset by 50 mmol/g (using 5 mmol/g increments) for clarity.



| Monomer       | Equivalent FDA | SA <sub>BET</sub> (m <sup>2</sup> g <sup>-1</sup> ) | V <sub>total</sub> (cm <sup>3</sup> /g) |
|---------------|----------------|-----------------------------------------------------|-----------------------------------------|
| Toluene       | 1.5            | 171                                                 | 0.14                                    |
| Toluene       | 1.6            | 452                                                 | 0.34                                    |
| Toluene       | 1.7            | 602                                                 | 0.46                                    |
| Toluene       | 1.9            | 731                                                 | 0.56                                    |
| Toluene       | 2.0            | 860                                                 | 0.62                                    |
| Toluene       | 2.3            | 746                                                 | 0.56                                    |
| Toluene       | 2.5            | 872                                                 | 0.66                                    |
| Toluene       | 2.7            | 800                                                 | 0.60                                    |
| Toluene       | 3.0            | 852                                                 | 0.61                                    |
| Toluene       | 4.0            | 810                                                 | 0.56                                    |
| Toluene       | 5.0            | 746                                                 | 0.51                                    |
| Chlorobenzene | 2.0            | 88                                                  | 0.12                                    |
| Chlorobenzene | 3.0            | 319                                                 | 0.41                                    |
| Fluorobenzene | 2.0            | 483                                                 | 0.38                                    |
| Fluorobenzene | 3.0            | 698                                                 | 0.52                                    |
| Anisole       | 2.0            | 627                                                 | 0.41                                    |
| Anisole       | 3.0            | 637                                                 | 0.40                                    |
| Phenol        | 2.0            | 58                                                  | 0.05                                    |
| Phenol        | 3.0            | 110                                                 | 0.12                                    |

**Fig. S6.4** Summary of the apparent SA<sub>BET</sub> and total pore volumes (V<sub>total</sub>) obtained for HCPs prepared. V<sub>total</sub> calculated from nitrogen isotherm in the range P/P<sub>0</sub>=0.89–0.99.

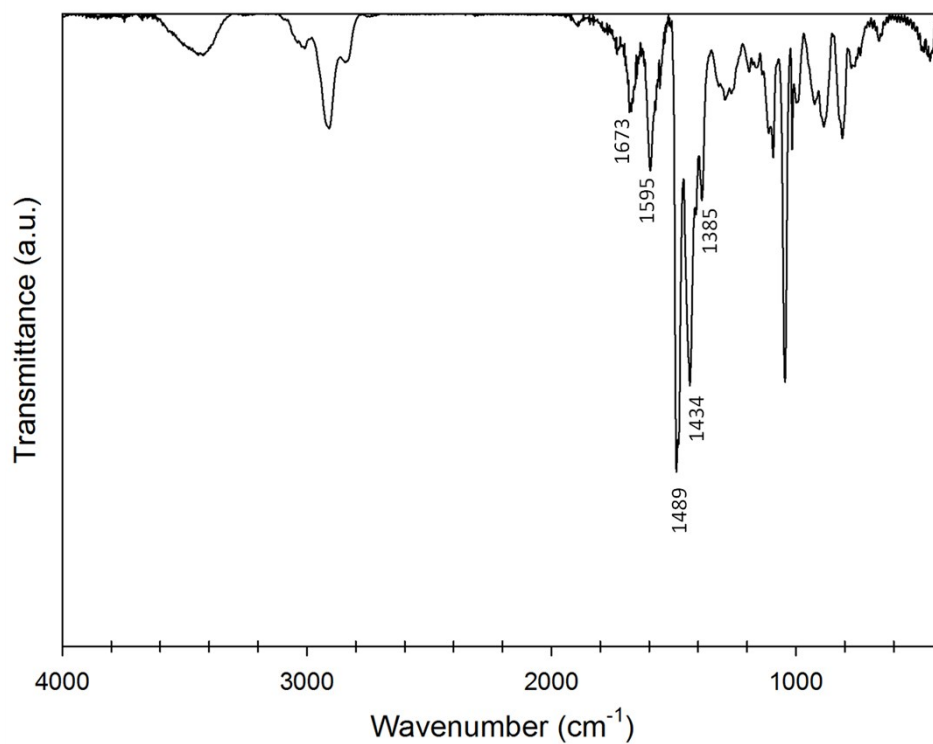

**Fig. S7.1** IR spectrum of chlorobenzene based HCP, prepared with 2 equivalents of FDA crosslinker.

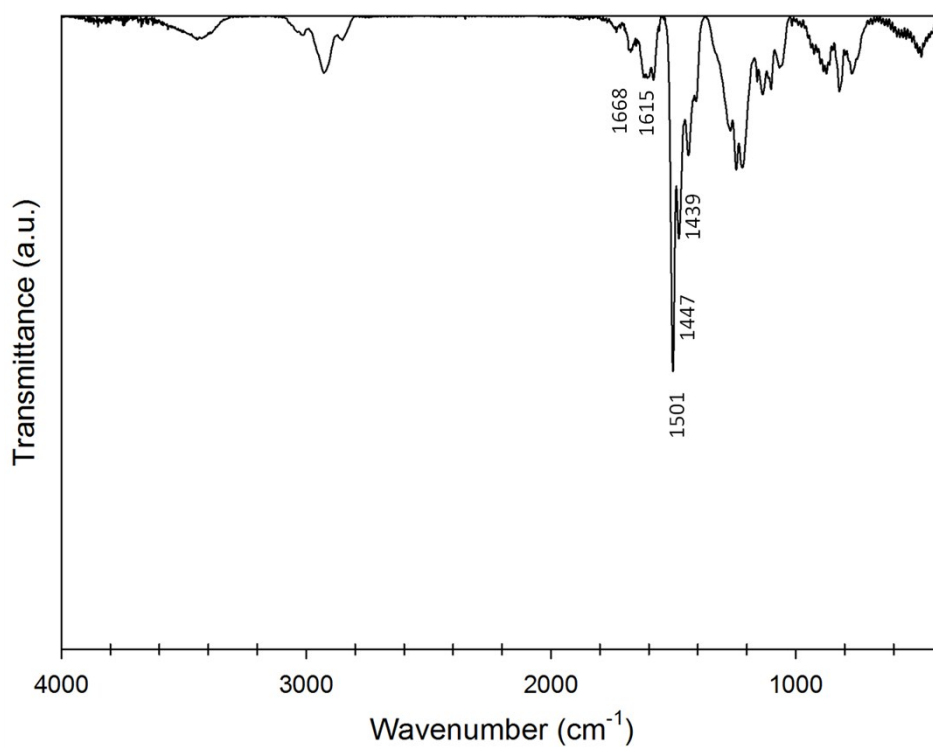

**Fig. S7.2** IR spectrum of fluorobenzene based HCP, prepared with 2 equivalents of FDA crosslinker.

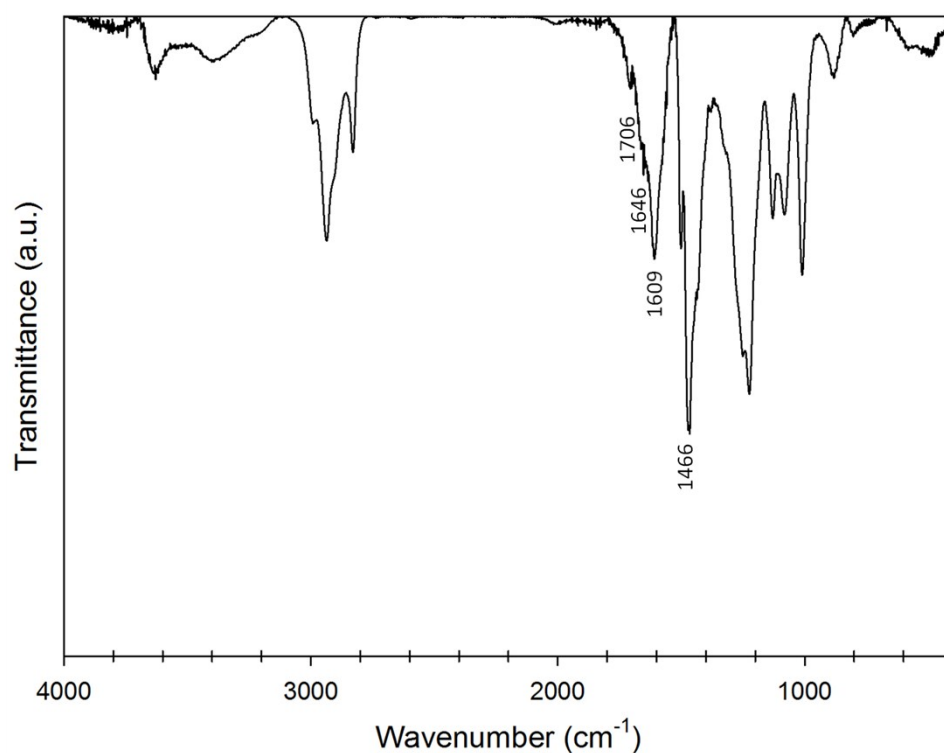

**Fig. S7.3** IR spectrum of anisole based HCP, prepared with 2 equivalents of FDA crosslinker.

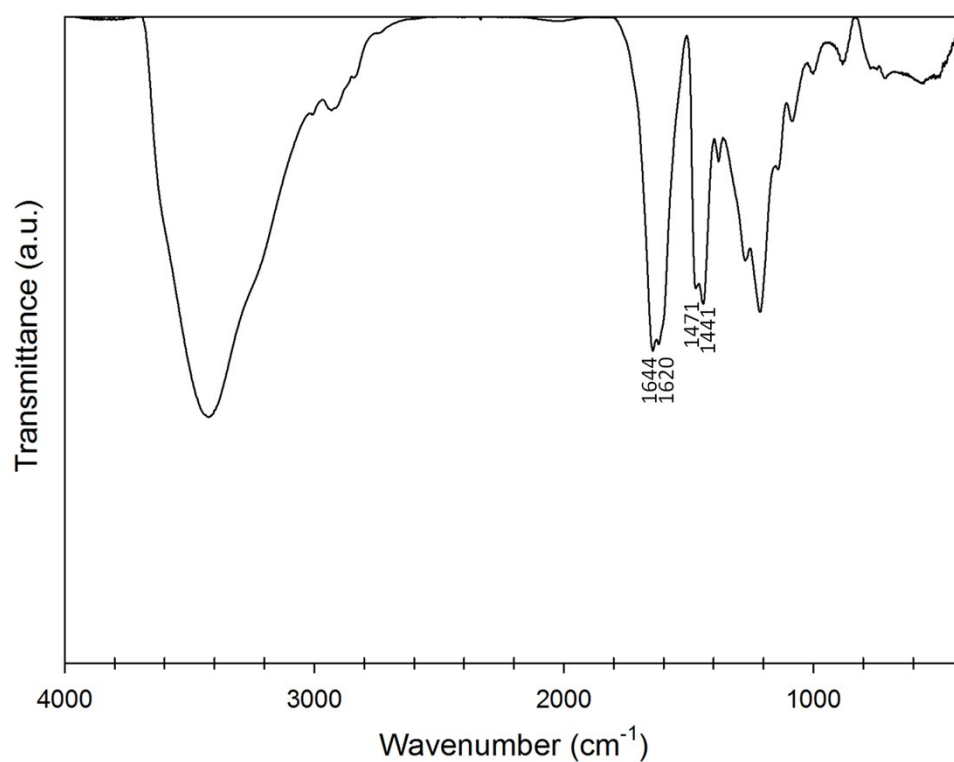

**Fig. S7.4** IR spectrum of phenol based HCP, prepared with 2 equivalents of FDA crosslinker.

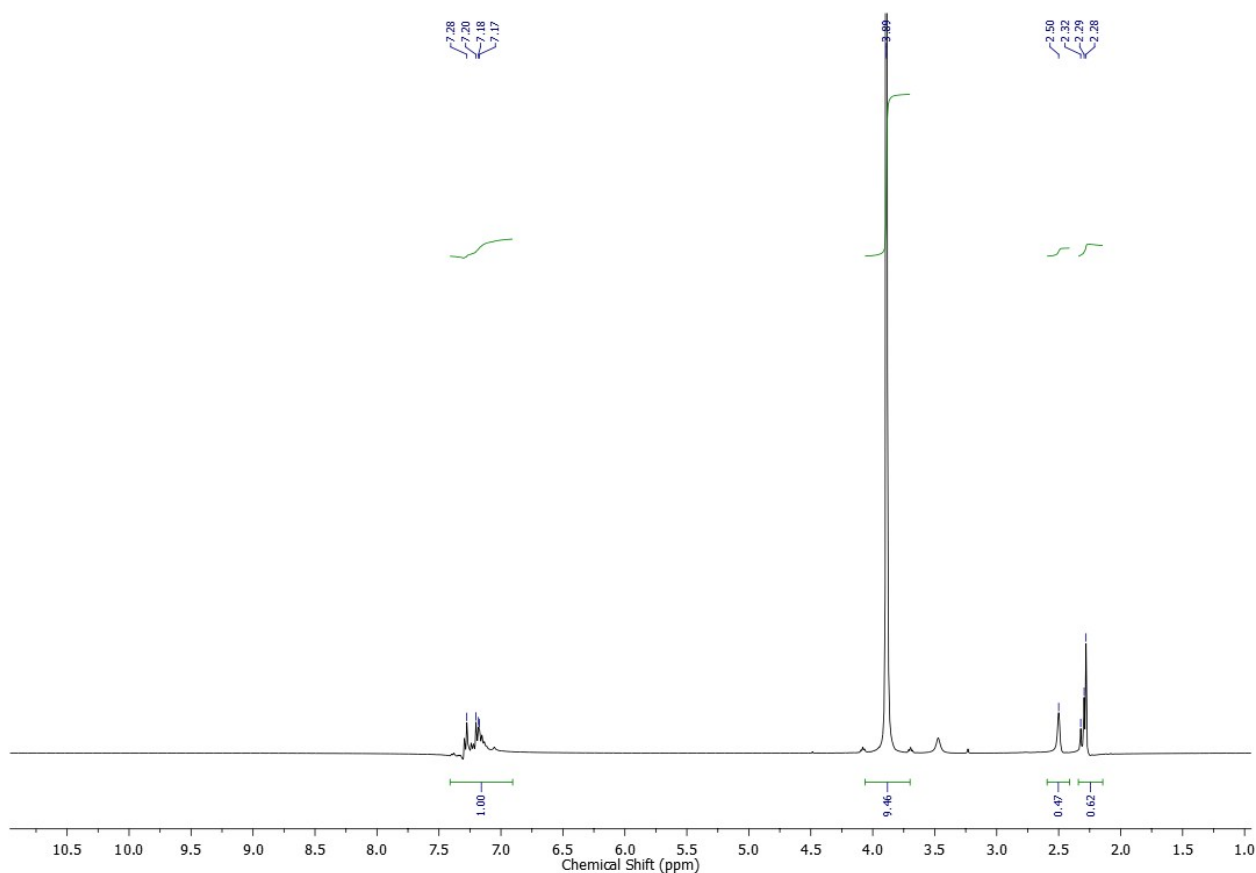

**Fig. S8**  $^1\text{H}$ -NMR spectrum (in dimethyl sulfoxide- $\text{d}_6$ ) obtained for the toluene oxidation test reaction, showing the absence of any aldehyde peak at ca. 9–10 ppm.

Procedure for toluene oxidation test reaction;

Toluene (10 mmol) was added to anhydrous 1,2-dichloroethane (10 mL) under a flow of nitrogen. Iron (III) chloride (20 mmol) was added and the reaction mixture heated to 80 °C for 18 hours. After such time a crude  $^1\text{H}$  NMR was taken in dimethyl sulfoxide- $\text{d}_6$ .

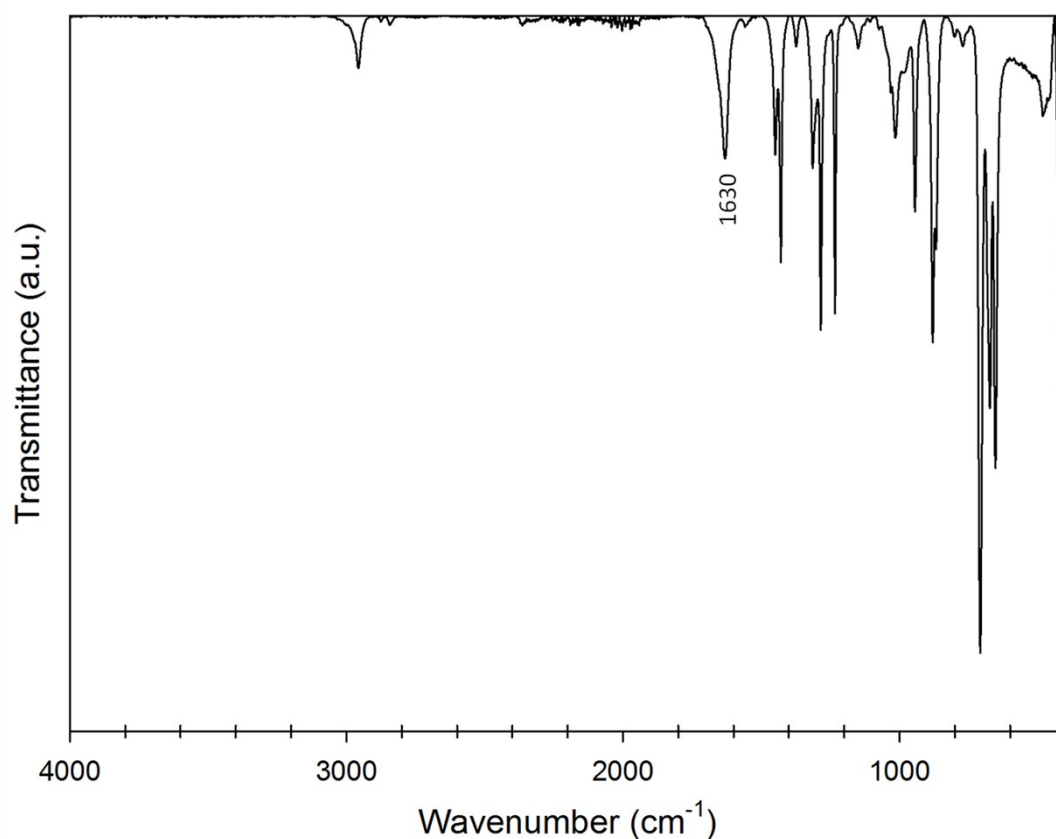

**Fig. S9** IR spectrum for formaldehyde dimethyl acetal (FDA) test reaction, indicating the absence of any carbonyl peaks in the 1670-1760  $\text{cm}^{-1}$  region.

Procedure for FDA test reaction;

Formaldehyde dimethyl acetal (20 mmol) was added to anhydrous 1,2-dichloroethane (10 mL) under a flow of nitrogen. Iron (III) chloride (20 mmol) was added and the reaction mixture heated to 80 °C for 18 hours. After such time, an ATR IR spectrum was recorded.

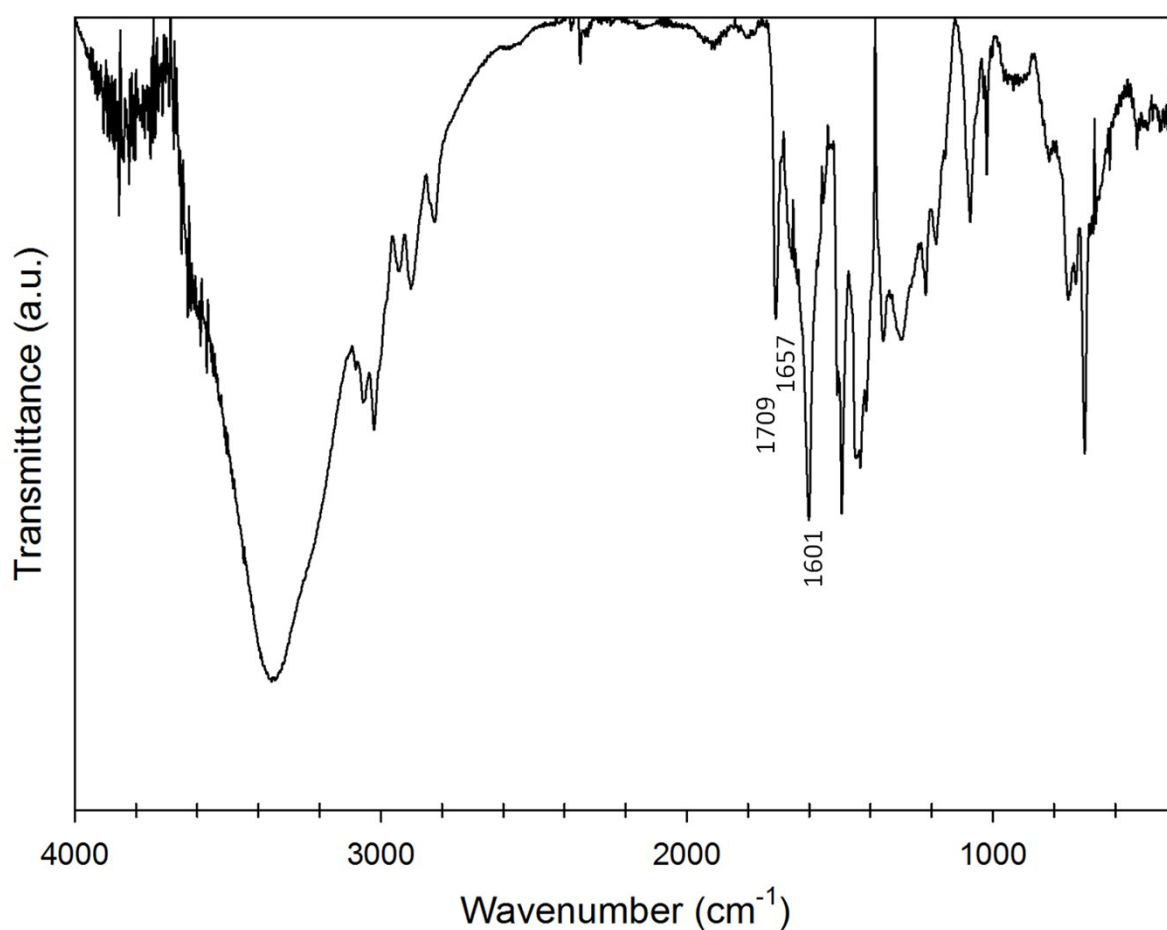

**Fig. S10** IR spectrum for benzyl methyl ether test reaction.

Procedure for benzyl methyl ether test reaction:

Benzyl methyl ether (10 mmol) was added to anhydrous 1,2-dichloroethane (10 mL) under a flow of nitrogen. Iron (III) chloride (20 mmol) was added and the reaction mixture heated to 80 °C for 18 hours. The solid product was removed by filtration and washed with methanol several times. The product was then further purified by Soxhlet extraction in methanol for 18 hours, followed by drying *in vacuo* at 60 °C for 18 hours. FTIR and gas sorption analysis (conducted using the same procedure detailed in the experimental section) was recorded on the obtained black solid.

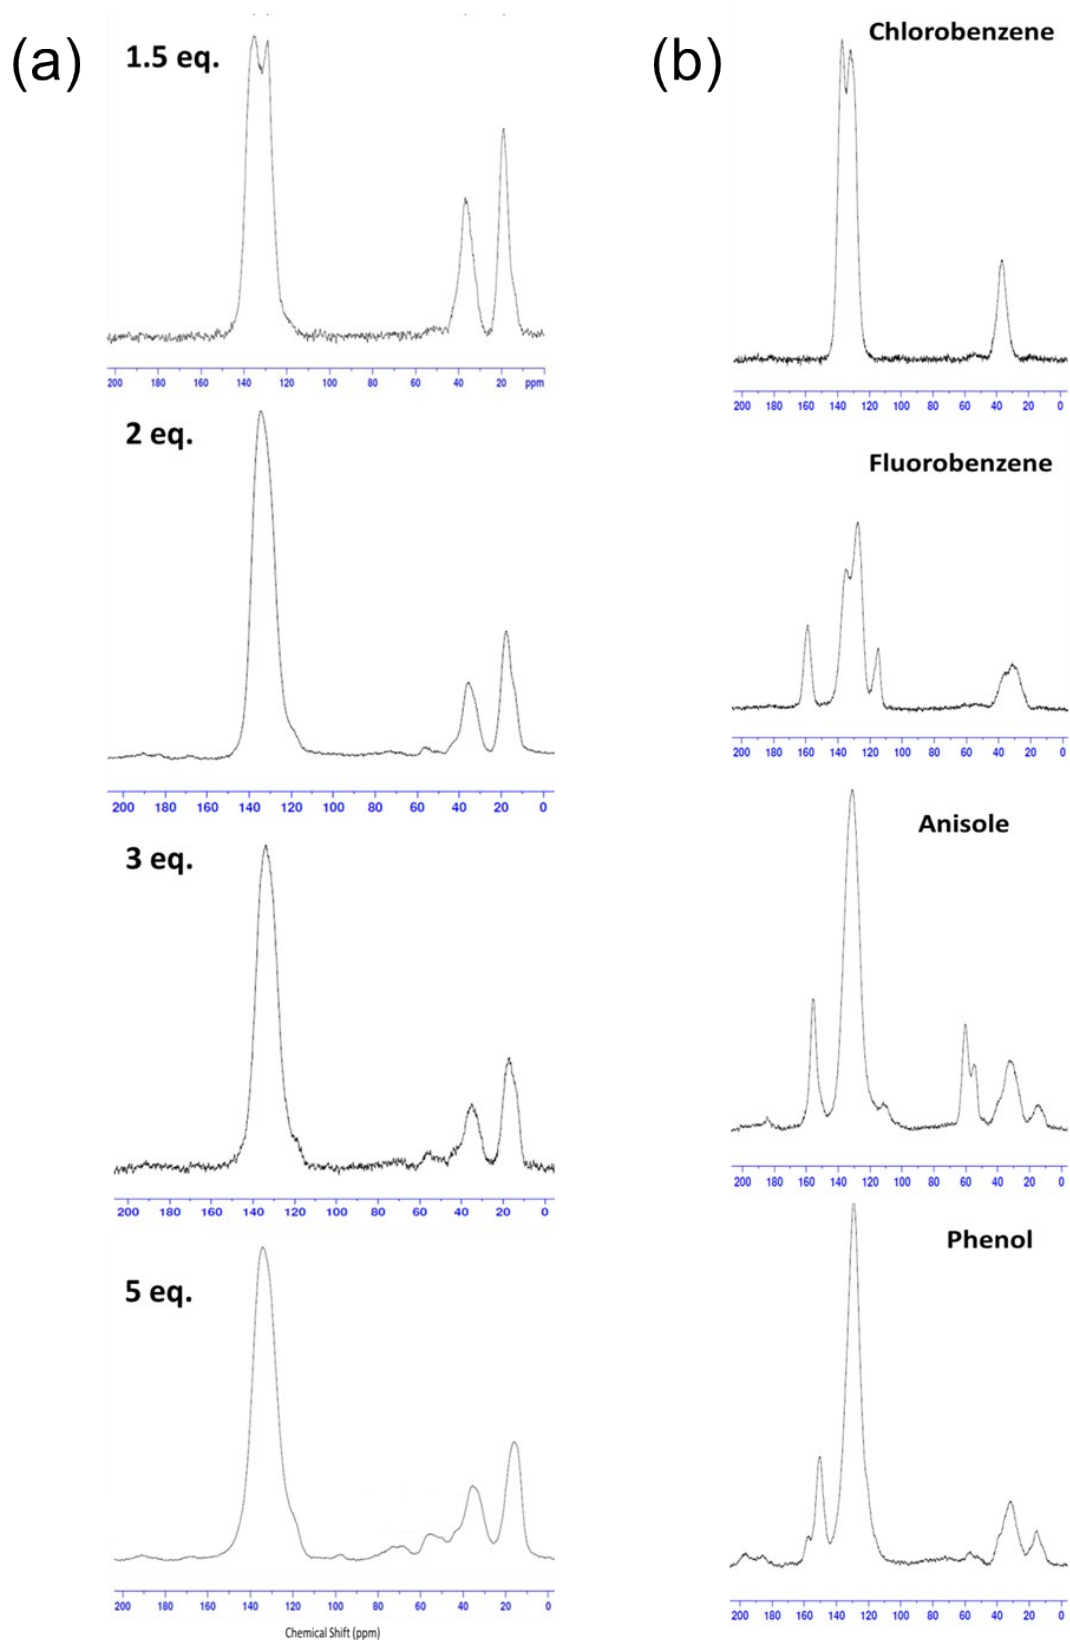

**Fig. S11** Cross-polarization (CP)  $^{13}\text{C}$  MAS natural abundance NMR spectrum of (a) toluene based HCP samples prepared with 1.5, 2.0, 3.0 and 5.0 equivalents of FDA and (b) for the HCPs prepared with other monomers using 2 equivalents of FDA in each case.

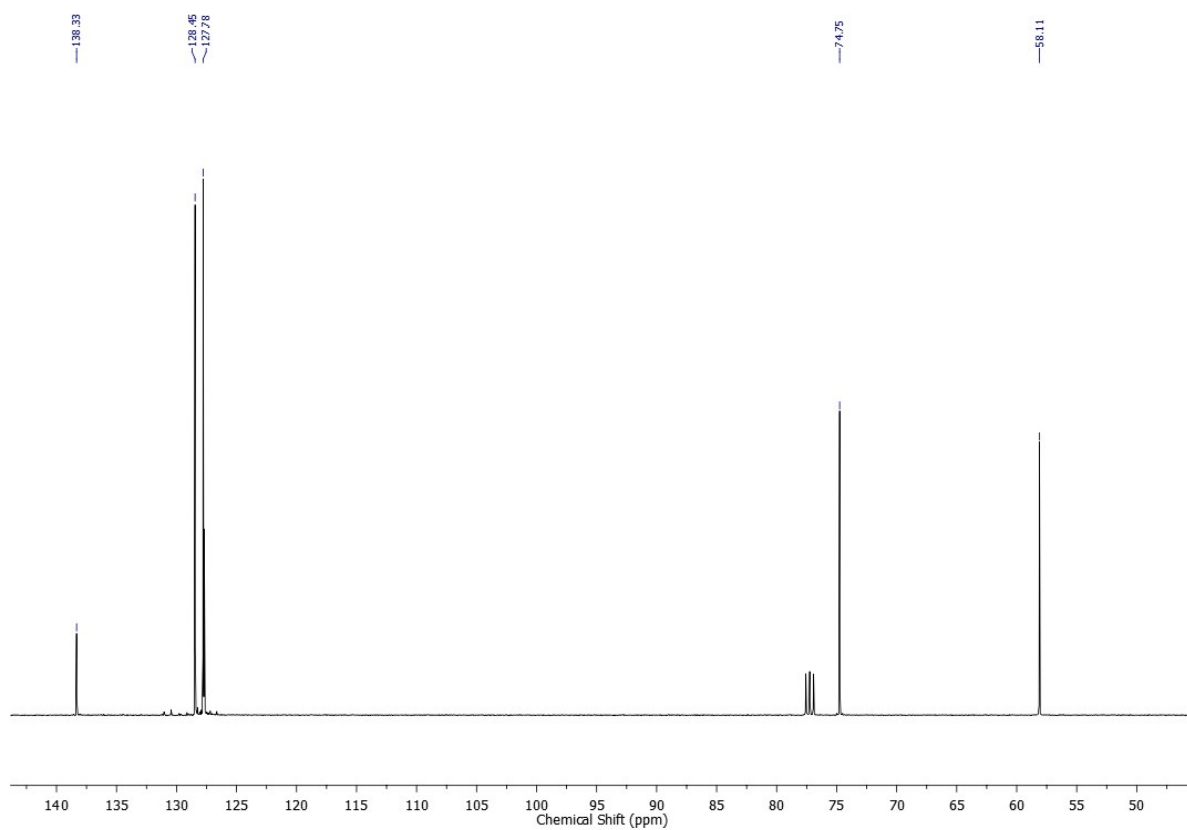

**Fig. S12**  $^{13}\text{C}$  NMR for benzyl methyl ether, in  $\text{CDCl}_3$ .



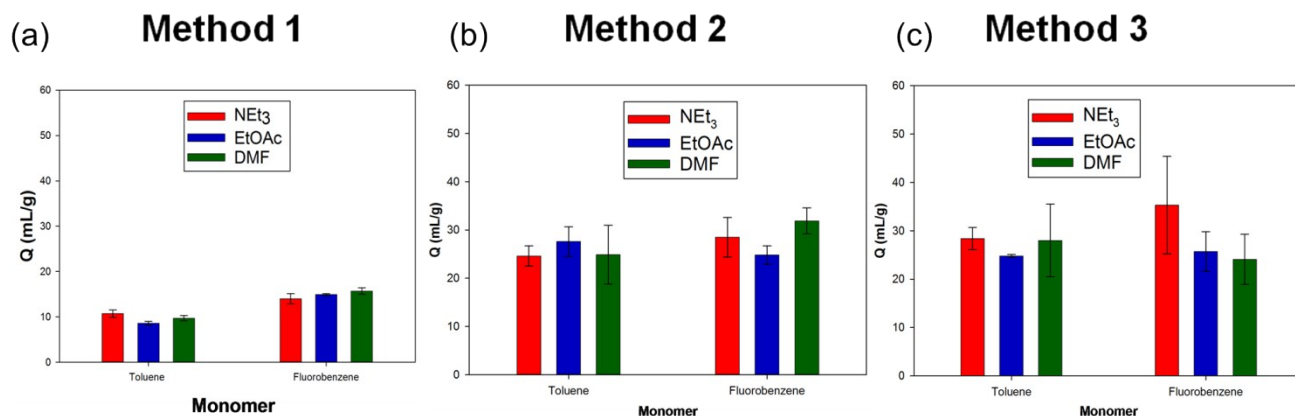

**Fig. S13** Swellability (Q) data obtained for three HCPs on exposure to the three CWA simulants triethylamine ( $\text{NEt}_3$ ), ethyl acetate ( $\text{EtOAc}$ ), and dimethylformamide ( $\text{DMF}$ ) using (a) Method 1, (b) Method 2, and (c) Method 3.

| Simulant         | Simulant added<br>(mL) | Recovered simulant<br>(mL) | Simulant lost<br>(mL) |
|------------------|------------------------|----------------------------|-----------------------|
| EtOAc            | 5.0                    | 4.3                        | 0.7                   |
| EtOAc            | 4.9                    | 4.3                        | 0.6                   |
| EtOAc            | 5.0                    | 4.3                        | 0.7                   |
| NEt <sub>3</sub> | 5.0                    | 4.3                        | 0.7                   |
| NEt <sub>3</sub> | 2.0                    | 1.5                        | 0.5                   |
| NEt <sub>3</sub> | 2.0                    | 1.5                        | 0.5                   |
| DMF              | 5.1                    | 4.4                        | 0.7                   |
| DMF              | 5.0                    | 4.6                        | 0.4                   |
| DMF              | 5.1                    | 4.5                        | 0.6                   |
| AcCl             | 1.7                    | 1.2                        | 0.5                   |
| AcCl             | 1.7                    | 1.3                        | 0.4                   |
| AcCl             | 4.6                    | 4.2                        | 0.4                   |

**Fig. S14** Summary of experiments to determine the residual loss on filtering different volumes of the CWA simulants EtOAc, NEt<sub>3</sub>, DMF, and AcCl, using the Method 2 procedure.

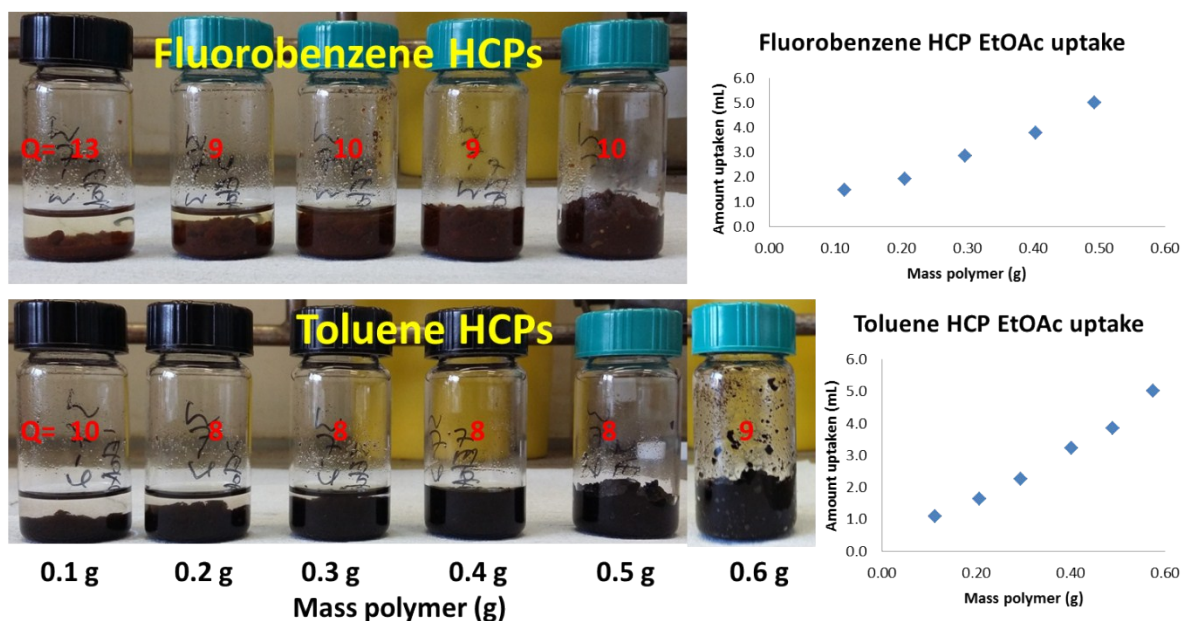

**Fig. S15** Scale-up experiments using Method 2 to determine the swelling of the fluorobenzene and toluene based HCPs on exposure to the simulant ethyl acetate. Each vial contains 5 mL of ethyl acetate with the indicated mass of polymer added. Q (mL/g) calculated as volume of simulant absorbed (mL)/mass polymer used (g).

#### Procedure for larger scale swelling experiments

The polymer (x g) was weighed into an empty vial and the simulant of interest (5 mL) added. The polymer was allowed to stand in the simulant for 18 hours. After such time, the mass of excess simulant was obtained by filtration of the polymer/simulant solution (using a funnel fitted with a plug of glass wool) into an empty pre-weighed vial. Calculating the volume of recovered agent (mL) allowed the volume of simulant absorbed (mL) by the polymer to be calculated. The swellability (Q) of the polymer could be defined by the amount of simulant absorbed (mL) divided by the mass of polymer used (g).

Increasing amounts of polymer was added to each vial until no excess simulant was observed.

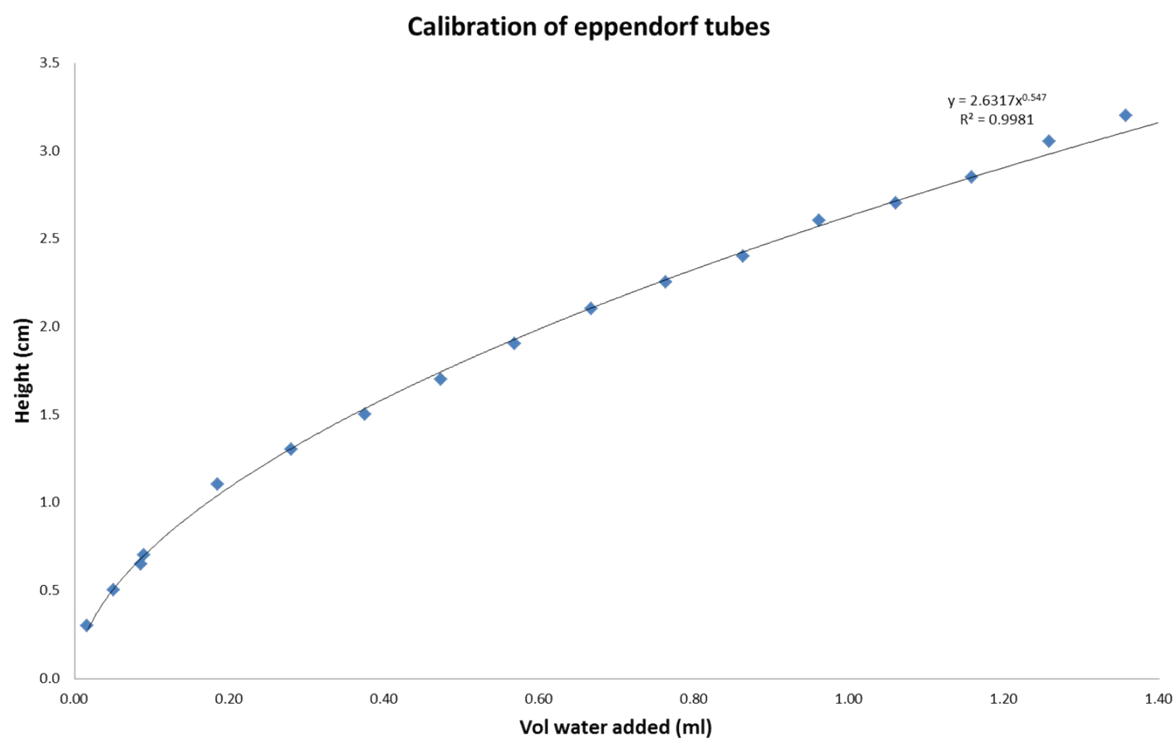

| Height of polymer in tube (cm) | Volume (ml) |
|--------------------------------|-------------|
| 0.3                            | 0.02        |
| 0.4                            | 0.03        |
| 0.5                            | 0.05        |
| 0.6                            | 0.07        |
| 0.7                            | 0.09        |
| 0.8                            | 0.11        |
| 0.9                            | 0.14        |
| 1.0                            | 0.17        |
| 1.1                            | 0.20        |
| 1.2                            | 0.24        |
| 1.3                            | 0.28        |
| 1.4                            | 0.31        |
| 1.5                            | 0.36        |
| 1.6                            | 0.40        |
| 1.7                            | 0.45        |
| 1.8                            | 0.50        |
| 1.9                            | 0.55        |

**Fig. S16** Calibration of the Eppendorf tubes with water, in order to determine the volume of swollen polymer inside the tube for Method 1.

| Material | Swellability, Q (mL/g) |                |                |                |
|----------|------------------------|----------------|----------------|----------------|
|          | NEt <sub>3</sub>       | EtOAc          | DMF            | AcCl           |
| AC-2     | 4.1 (+/- 0.6)          | 4.0 (+/- 0.3)  | 4.5 (+/- 0.3)  | 4.3 (+/- 0.3)  |
| Y-Z      | 4.7 (+/- 0.8)          | 4.9 (+/- 0.6)  | 2.3 (+/- 1.3)  | 2.9 (+/- 0.8)  |
| MS       | 1.5 (+/- 0.2)          | 1.6 (+/- 0.1)  | 1.3 (+/- 0.1)  | 1.9 (+/- 0.2)  |
| CMP-1    | 3.4 (+/- 0.3)          | 3.5 (+/- 0.4)  | 3.4 (+/- 0.4)  | 3.6 (+/- 0.1)  |
| F-HCP    | 16.4 (+/- 0.3)         | 12.3 (+/- 0.3) | 15.1 (+/- 0.1) | 11.0 (+/- 0.2) |

**Fig. S17.1** Swellability (Q) for activated charcoal 100–400 mesh (AC-2), molecular sieves 3 Å (MS), y-zeolite (Y-Z), CMP-1 and fluorobenzene derived HCP (F-HCP) prepared using 3 equivalents of FDA against triethylamine (NEt<sub>3</sub>), ethyl acetate (EtOAc), dimethylformamide (DMF), and acetyl chloride (AcCl).

Q values calculated as an average of three measurements, with error (shown in brackets) calculated as the standard deviation.

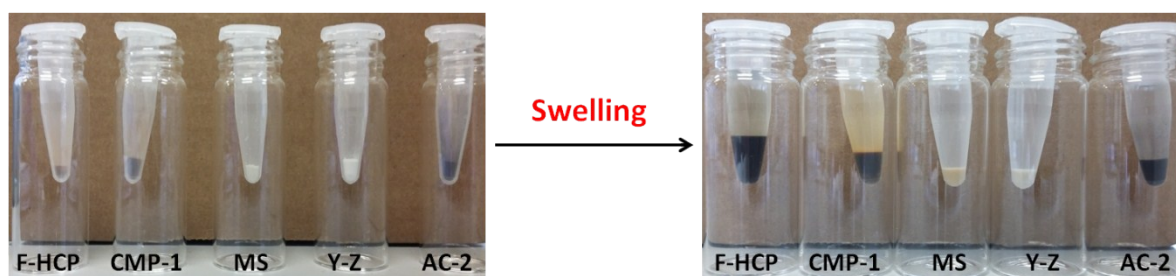

**Fig. S17.2** Before and after swelling of the materials against acetyl chloride (AcCl).

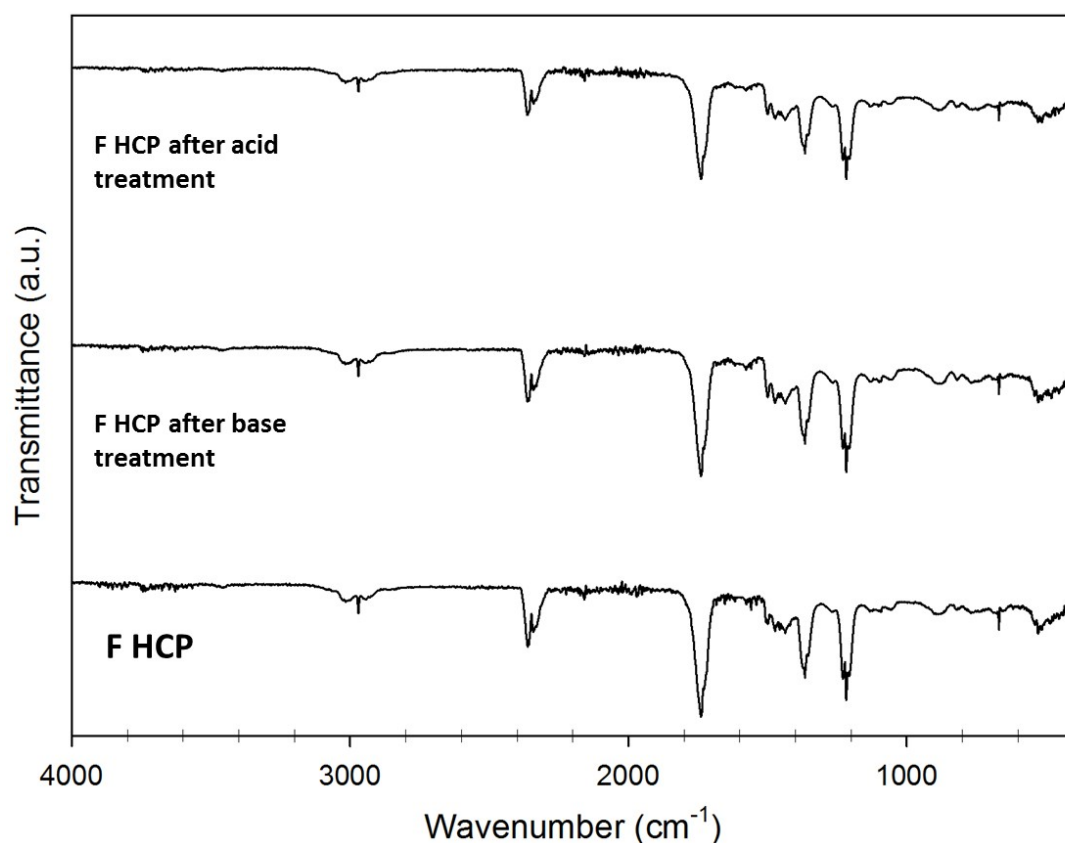

| HCP                           | Actual Carbon (%) | Actual Hydrogen (%) |
|-------------------------------|-------------------|---------------------|
| F-HCP (prior to treatment)    | 73.11             | 4.05                |
| F-HCP (after base treatment ) | 72.46             | 4.04                |
| F-HCP (after acid treatment ) | 74.73             | 4.16                |

| HCP                                       | Prior to treatment |                                         | After base treatment |                                         | After acid treatment |                                         |
|-------------------------------------------|--------------------|-----------------------------------------|----------------------|-----------------------------------------|----------------------|-----------------------------------------|
|                                           | SA <sub>BET</sub>  | V <sub>total</sub> (cm <sup>3</sup> /g) | SA <sub>BET</sub>    | V <sub>total</sub> (cm <sup>3</sup> /g) | SA <sub>BET</sub>    | V <sub>total</sub> (cm <sup>3</sup> /g) |
| Fluorobenzene derived (3 equivalents FDA) | 633                | 0.45                                    | 602                  | 0.39                                    | 669                  | 0.46                                    |

**Fig. S18** IR spectrum, elemental analysis, SA<sub>BET</sub>, and total pore volume obtained for the HCP derived from fluorobenzene (prepared using 3 equivalents of FDA) after stirring of the HCP in acid (1 M aqueous sulfuric acid) or base (1 M aqueous sodium hydroxide) for a period of 24 hours, including a 1 hour reflux followed by wash with deionised water, then methanol and vacuum dried. V<sub>total</sub> calculated from nitrogen isotherm in the range P/P<sub>0</sub>=0.89–0.99.
